# Supplementary material for: Functionally Validating Evolutionary Conserved Risk Genes for Parkinson’s Disease in Drosophila melanogaster
Source: MDPI journal article supplement (doi:10.3390/insects14020168), 2023-02-09
Supplement: s1 [file s1]

This file encompasses the below supplementary information associated with the manuscript.

### Supplementary Figures

Figure S1                      The rapid iterative negative geotaxis (RING) apparatus.

### Supplementary Tables

|           |                                                                                  |
|-----------|----------------------------------------------------------------------------------|
| Table S1  | Overview PD associated genes and their <i>Drosophila</i> orthologs. [Excel file] |
| Table S2  | PD risk genes and their evolutionary conserved genes in <i>D. melanogaster</i> . |
| Table S3  | RNA sequencing metrics.                                                          |
| Table S4  | Fold change of gene expression knockdown.                                        |
| Table S5  | Statistics on age-effect.                                                        |
| Table S6  | Comparison of RNAi knockdown and common control at day 5.                        |
| Table S7  | Comparison of RNAi knockdown and common control at day 10.                       |
| Table S8  | Comparison of RNAi knockdown and common control at day 15.                       |
| Table S9  | Survival data.                                                                   |
| Table S10 | Phenotypic data from the RING assay. [Excel file]                                |

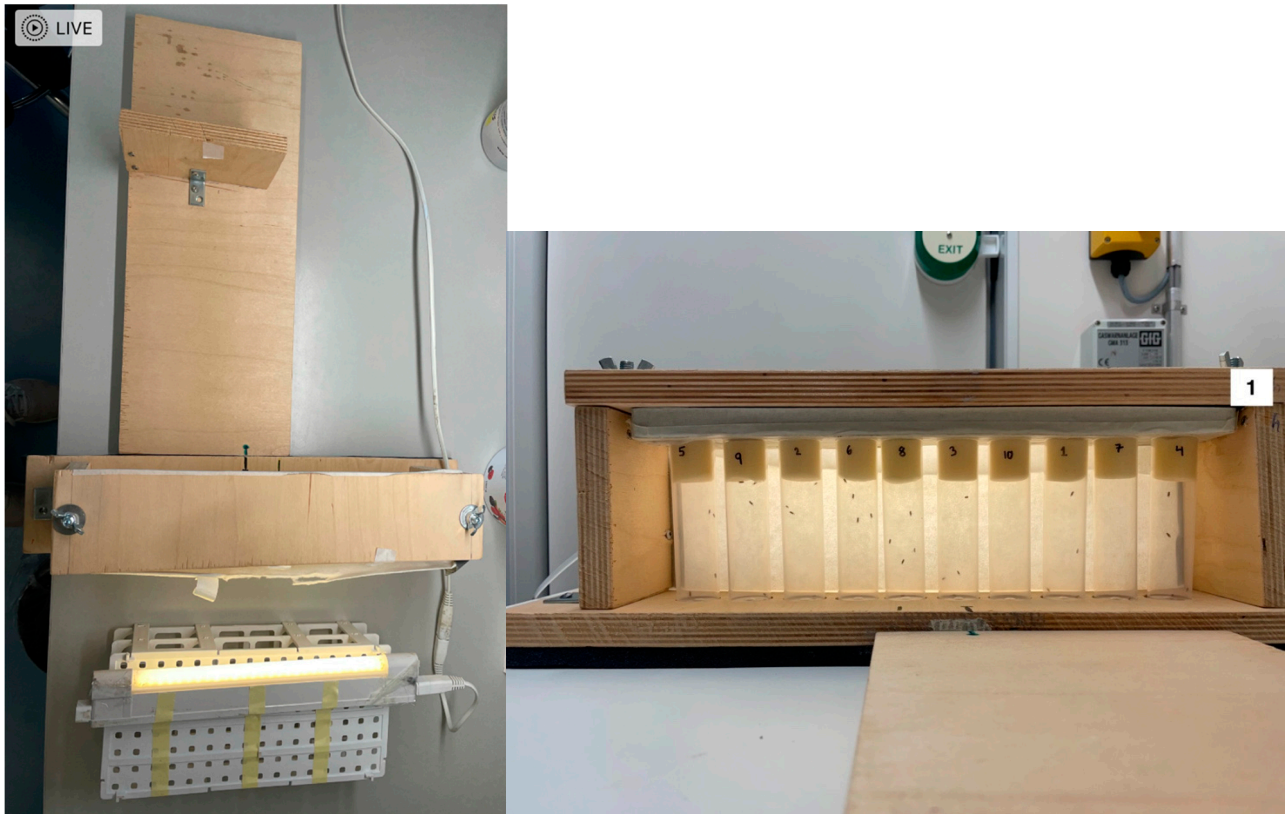

**Supplementary Figure S1** | Overview of the rapid iterative negative geotaxis (RING) system. The RING system consists of a wooden box with an open face and a removable lid held in place with hinges on each side, fastened using a bolt and a nut. The floor of the apparatus supports ten 46.63 mL vials (25 mm x 95 mm) (VWR™, PA) with a flat bottom. The lid is lined with foam to ensure that each tube is fastened in the apparatus. Adjacent to the face of the apparatus is a wooden board with a vertical board attached, allowing placement of a camera apparatus 30 cm in front of the RING apparatus. The camera apparatus was fastened to the wooded board using masking tape. To provide uniform lightning of the RING apparatus, a light source was placed behind a white opaque filter attached to the backside of the apparatus.

**Supplementary Table S2** | Overview of the 11 selected PD risk genes with DIOPT score  $\geq 12$  and where a homozygous viable UAS line was available from VDRC. Complete overview of all PD associated genes can be seen in Supplementary Table S2.

| PD risk gene    | Reference                                                    | Fly gene<br>symbol | VDRC strain | DIOPT score | UAS genotype                         |
|-----------------|--------------------------------------------------------------|--------------------|-------------|-------------|--------------------------------------|
| <i>CLCN3</i>    | Nalls et al. 2019                                            | <i>Clc-c</i>       | 6465        | 12          | w <sup>1118</sup> ; P{GD1663}v6465   |
| <i>SLC44A1</i>  | Nalls et al. 2019<br>Chang et al. 2017                       | <i>Ctl1</i>        | 12242       | 14          | w <sup>1118</sup> ; P{GD3579}v12242  |
| <i>HIP1R</i>    | Iwaki et al. 2019                                            | <i>Hip1</i>        | 16137       | 12          | w <sup>1118</sup> ; P{GD7152}v16137  |
| <i>ATP6V0A1</i> | Chang et al. 2017                                            | <i>Vha100-1</i>    | 22924       | 13          | w <sup>1118</sup> ; P{GD12710}v22924 |
| <i>SH3GL2</i>   | Nalls et al. 2019<br>Chang et al. 2017                       | <i>EndoA</i>       | 24617       | 12          | w <sup>1118</sup> ; P{GD7681}v24617  |
| <i>MCCC1</i>    | Nalls et al. 2019<br>Foo et al. 2020<br>Chang et al. 2017    | <i>Mccc1</i>       | 25406       | 15          | w <sup>1118</sup> ; P{GD9729}v25406  |
| <i>RPS6KL1</i>  | Nalls et al. 2019                                            | <i>CG7156</i>      | 26035       | 12          | w <sup>1118</sup> ; P{GD10657}v26035 |
| <i>MICU3</i>    | Chang et al. 2017                                            | <i>MICU3</i>       | 41259       | 14          | w <sup>1118</sup> ; P{GD5587}v41259  |
| <i>FAM49B</i>   | Nalls et al. 2019                                            | <i>CG32066</i>     | 44825       | 12          | w <sup>1118</sup> ; P{GD8705}v44825  |
| <i>CTSB</i>     | Nalls et al. 2019                                            | <i>CtsB1</i>       | 45345       | 14          | w <sup>1118</sup> ; P{GD6407}v45345  |
| <i>SLC41A1</i>  | Nalls et al. 2019<br>Chang et al. 2017<br>Iwaki et al. 20019 | <i>CG33181</i>     | 47868       | 13          | w <sup>1118</sup> ; P{GD16951}v47868 |
| -               | -                                                            | Control            | 60000       | NA          | w <sup>1118</sup>                    |

**Supplementary Table S3** | QC metrics from BGI. After sequencing, the raw reads were filtered. Data filtering includes removing adaptor sequences, contamination, and low-quality reads from raw reads. Clean reads: Total clean reads number. Clean bases: Total clean bases number. Q20: The number of nucleotide with quality higher than 20/nucleotide(clean read1,read2).

| VDRC number | Fly symbol      | Human symbol    | RNA concentration<br>(ng/μl) | Volume<br>(μl) | Total Mass<br>(μg) | Clean<br>reads | Clean bases   | Q20(%) |
|-------------|-----------------|-----------------|------------------------------|----------------|--------------------|----------------|---------------|--------|
| 6465        | <i>ClC-c</i>    | <i>CLCN3</i>    | 1.39                         | 40             | 0.06               | 51,853,150     | 5,185,315,000 | 95.68% |
| 12242       | <i>Ctl1</i>     | <i>SLC44A1</i>  | 10.3                         | 40             | 0.41               | 52,239,002     | 5,223,900,200 | 95.94% |
| 16137       | <i>Hip1</i>     | <i>HIP1R</i>    | 24.1                         | 40             | 0.96               | 51,662,710     | 5,166,271,000 | 95.52% |
| 22924       | <i>Vha100-1</i> | <i>ATP6V0A1</i> | 3.69                         | 40             | 0.15               | 47,561,146     | 4,756,114,600 | 95.83% |
| 24617       | <i>EndoA</i>    | <i>SH3GL2</i>   | 26.9                         | 40             | 1.08               | 51,933,872     | 5,193,387,200 | 95.44% |
| 25406       | <i>Mccc1</i>    | <i>MCCC1</i>    | 4.31                         | 40             | 0.17               | 49,913,570     | 4,991,357,000 | 95.58% |
| 26035       | <i>CG7156</i>   | <i>RPS6KL1</i>  | 10.3                         | 40             | 0.41               | 50,451,936     | 5,045,193,600 | 95.58% |
| 41259       | <i>MICU3</i>    | <i>MICU3</i>    | 11.6                         | 40             | 0.46               | 54,369,786     | 5,436,978,600 | 95.72% |
| 44825       | <i>CG32066</i>  | <i>FAM49B</i>   | 31.6                         | 40             | 1.26               | 52,050,708     | 5,205,070,800 | 95.95% |
| 45345       | <i>CtsB1</i>    | <i>CTSB</i>     | 7.87                         | 40             | 0.31               | 52,103,894     | 5,210,389,400 | 95.78% |
| 47868       | <i>CG33181</i>  | <i>SLC41A1</i>  | 16.3                         | 40             | 0.65               | 51,782,270     | 5,178,227,000 | 95.38% |
| 60000       | Control line    | NA              | 22                           | 40             | 0.88               | 51,963,058     | 5,196,305,800 | 95.74% |

**Supplementary Table S4** | Within-gene read counts with between sample normalization using trimmed mean of M-values (TMM) of the 11 selected putative risk genes for sporadic PD. The column “TMM<sub>UAS-GAL4</sub>” shows the TMM of the respective gene knockdown of the UAS-GAL4 lines, whereas the column “TMM<sub>W1118-GAL4</sub>” shows the corresponding gene’s TMM for the common control line. The column “Ratio” is the ratio between TMM<sub>UAS-GAL4</sub> and TMM<sub>W1118-GAL4</sub>.

| <b>Fly gene<br/>symbol</b> | <b>TMM<sub>UAS-GAL4</sub></b> | <b>TMM<sub>W1118-GAL4</sub></b> | <b>Ratio</b> | <b>log2(Ratio)</b> |
|----------------------------|-------------------------------|---------------------------------|--------------|--------------------|
| <i>Ctsb1</i>               | 23.0225                       | 84.3228                         | 0.27         | -1.87              |
| <i>CG7156</i>              | 12.608                        | 26.2477                         | 0.48         | -1.058             |
| <i>Mccc1</i>               | 25.4293                       | 43.815                          | 0.58         | -0.78              |
| <i>Hip1</i>                | 31.8947                       | 45.8818                         | 0.70         | -0.52              |
| <i>CG33181</i>             | 126.467                       | 176.293                         | 0.72         | -0.48              |
| <i>Vha100.1</i>            | 129.217                       | 177.945                         | 0.73         | -0.46              |
| <i>CG32066</i>             | 50.3101                       | 66.5491                         | 0.76         | -0.40              |
| <i>Ctl1</i>                | 61.1542                       | 69.6493                         | 0.88         | -0.19              |
| <i>MICU3</i>               | 59.8264                       | 65.331                          | 0.92         | -0.13              |
| <i>ClCc</i>                | 140.981                       | 131.018                         | 1.08         | 0.11               |
| <i>EndoA</i>               | 388.711                       | 358.581                         | 1.08         | 0.12               |

**Supplementary Table S5** | Statistics from analysis of variance (ANOVA) within each *Drosophila* line investigating whether an effect of ageing on flight response was observed. The table contains for each test day the mean activity (Mean), standard deviation of the mean (SD), the number of observations (n, mean of five pictures for five flies within test vial), the regression coefficient (Beta), and the associated *P*-value from ANOVA.

| Fly line        | Day 5 |      |    | Day 10 |      |    | Day 15 |      |    | Beta  | <i>P</i> -value        |
|-----------------|-------|------|----|--------|------|----|--------|------|----|-------|------------------------|
|                 | Mean  | SD   | n  | Mean   | SD   | n  | Mean   | SD   | n  |       |                        |
| <i>Ctl1</i>     | 2.34  | 1.26 | 45 | 1.76   | 1.03 | 45 | 1.92   | 1.34 | 45 | -0.04 | 0.07                   |
| <i>Hip1</i>     | 2.86  | 1.14 | 59 | 2.63   | 1.13 | 60 | 3.1    | 1.08 | 60 | 0.03  | 0.18                   |
| <i>Vha100-1</i> | 2.4   | 1.24 | 55 | 2.06   | 1.16 | 50 | 1.62   | 1.33 | 20 | -0.07 | 0.03                   |
| <i>Mccc1</i>    | 2.84  | 0.97 | 69 | 2.82   | 1.19 | 73 | 2.75   | 1.14 | 70 | -0.01 | 0.65                   |
| <i>CG7156</i>   | 2.67  | 1.24 | 69 | 2.49   | 1.19 | 70 | 2.04   | 0.96 | 65 | -0.06 | 0.0018                 |
| <i>MICU3</i>    | 1.84  | 1.02 | 74 | 1.78   | 1.08 | 67 | 1.71   | 1.1  | 65 | -0.01 | 0.4                    |
| <i>CG32066</i>  | 2.63  | 0.88 | 75 | 2.25   | 1.19 | 80 | 2.44   | 1.03 | 75 | -0.02 | 0.28                   |
| <i>CtsB1</i>    | 2.84  | 1.12 | 84 | 2.17   | 1.24 | 80 | 1.17   | 1.1  | 45 | -0.16 | $1.97 \times 10^{-13}$ |
| <i>CG33181</i>  | 2.76  | 1.1  | 74 | 2.34   | 1.06 | 75 | 2.03   | 0.98 | 75 | -0.07 | $4.6 \times 10^{-6}$   |
| <i>Control</i>  | 2.73  | 1.03 | 84 | 2.82   | 1.21 | 90 | 2.63   | 1.13 | 85 | -0.01 | 0.53                   |

**Supplementary Table S6** | Statistics from analysis of variance (ANOVA) comparing each *Drosophila* knockdown line with the common control line (w<sup>1118</sup>-GAL4) at test day 5. The table contains the mean activity (Mean), standard deviation of the mean (SD), the number of observations (n, mean of five pictures for five flies within test vial), the difference between knockdown line and control, the standard error of the difference in activity (computed as  $\sqrt{\frac{SD_{UAS-GAL4}}{n_{UAS-GAL4}} + \frac{SD_{W^{1118}-GAL4}}{n_{W^{1118}-GAL4}}}$ ), the %-reduction in activity compared to the control line, the associated *P*-value from ANOVA, and the false-discovery rate adjusted (FDR) *P*-value.

| Test day | Fly line        | Human gene      | Mean | SD   | n  | Difference<br>to w <sup>1118</sup> | SE on<br>difference | %-reduction<br>to w <sup>1118</sup> | <i>P</i> -value | FDR      |
|----------|-----------------|-----------------|------|------|----|------------------------------------|---------------------|-------------------------------------|-----------------|----------|
| 5        | <i>MICU3</i>    | <i>MICU3</i>    | 1.84 | 1.02 | 74 | -0.89                              | 0.16                | 32.75                               | 2.94E-07        | 2.65E-06 |
| 5        | <i>Ctl1</i>     | <i>SLC44A1</i>  | 2.34 | 1.26 | 45 | -0.39                              | 0.20                | 14.18                               | 9.11E-02        | 4.10E-01 |
| 5        | <i>Vha100-1</i> | <i>ATP6V0A1</i> | 2.40 | 1.24 | 55 | -0.33                              | 0.19                | 11.95                               | 1.85E-01        | 5.54E-01 |
| 5        | <i>Hip1</i>     | <i>HIP1R</i>    | 2.86 | 1.14 | 59 | 0.13                               | 0.18                | -4.65                               | 5.83E-01        | 7.50E-01 |
| 5        | <i>CtsB1</i>    | <i>CTSB</i>     | 2.84 | 1.12 | 84 | 0.11                               | 0.16                | -4.17                               | 4.04E-01        | 7.50E-01 |
| 5        | <i>Mccc1</i>    | <i>MCCC1</i>    | 2.84 | 0.97 | 69 | 0.10                               | 0.16                | -3.83                               | 5.38E-01        | 7.50E-01 |
| 5        | <i>CG32066</i>  | <i>FAM49B</i>   | 2.63 | 0.88 | 75 | -0.10                              | 0.15                | 3.82                                | 4.17E-01        | 7.50E-01 |
| 5        | <i>CG7156</i>   | <i>RPS6KL1</i>  | 2.67 | 1.24 | 69 | -0.06                              | 0.17                | 2.21                                | 9.00E-01        | 9.00E-01 |
| 5        | <i>CG33181</i>  | <i>SLC41A1</i>  | 2.76 | 1.10 | 74 | 0.03                               | 0.16                | -0.97                               | 8.14E-01        | 9.00E-01 |

**Supplementary Table S7** | Statistics from analysis of variance (ANOVA) comparing each *Drosophila* knockdown line with the common control line (w<sup>1118</sup>-GAL4) at test day 10. The table contains the mean activity (Mean), standard deviation of the mean (SD), the number of observations (n, mean of five pictures for five flies within test vial), the difference between knockdown line and control, the standard error of the difference in activity (computed as  $\sqrt{\frac{SD_{UAS-GAL4}}{n_{UAS-GAL4}} + \frac{SD_{W^{1118}-GAL4}}{n_{W^{1118}-GAL4}}}$ ), the %-reduction in activity compared to the control line, the associated *P*-value from ANOVA, and the false-discovery rate (FDR) adjusted *P*-value.

| Test day | Fly line        | Human gene      | Mean  | SD    | n  | Difference<br>to w <sup>1118</sup> | SE on<br>difference | %-reduction<br>to w <sup>1118</sup> | <i>P</i> -value | FDR      |
|----------|-----------------|-----------------|-------|-------|----|------------------------------------|---------------------|-------------------------------------|-----------------|----------|
| 10       | <i>Ctl1</i>     | <i>SLC44A1</i>  | 1.757 | 1.031 | 45 | -1.06                              | 0.19                | 37.61                               | 3.76E-07        | 1.69E-06 |
| 10       | <i>MICU3</i>    | <i>MICU3</i>    | 1.776 | 1.076 | 67 | -1.04                              | 0.17                | 36.93                               | 1.04E-07        | 9.38E-07 |
| 10       | <i>Vha100-1</i> | <i>ATP6V0A1</i> | 2.056 | 1.159 | 50 | -0.76                              | 0.19                | 26.97                               | 1.96E-03        | 4.42E-03 |
| 10       | <i>CtsB1</i>    | <i>CTSB</i>     | 2.171 | 1.244 | 80 | -0.65                              | 0.17                | 22.91                               | 6.20E-05        | 1.86E-04 |
| 10       | <i>CG32066</i>  | <i>FAM49B</i>   | 2.251 | 1.186 | 80 | -0.57                              | 0.17                | 20.07                               | 4.53E-03        | 8.16E-03 |
| 10       | <i>CG33181</i>  | <i>SLC41A1</i>  | 2.340 | 1.060 | 75 | -0.48                              | 0.17                | 16.92                               | 2.17E-02        | 3.26E-02 |
| 10       | <i>CG7156</i>   | <i>RPS6KL1</i>  | 2.485 | 1.190 | 70 | -0.33                              | 0.17                | 11.74                               | 4.33E-01        | 4.87E-01 |
| 10       | <i>Hip1</i>     | <i>HIP1R</i>    | 2.634 | 1.127 | 60 | -0.18                              | 0.18                | 6.47                                | 4.06E-01        | 4.87E-01 |
| 10       | <i>Mccc1</i>    | <i>MCCC1</i>    | 2.825 | 1.187 | 73 | 0.01                               | 0.17                | -0.32                               | 7.21E-01        | 7.21E-01 |

**Supplementary Table S8** | Statistics from analysis of variance (ANOVA) comparing each *Drosophila* knockdown line with the common control line (w<sup>1118</sup>-GAL4) at test day 15. The table contains the mean activity (Mean), standard deviation of the mean (SD), the number of observations (n, mean of five pictures for five flies within test vial), the difference between knockdown line and control, the standard error of the difference in activity (computed as  $\sqrt{\frac{SD_{UAS-GAL4}}{n_{UAS-GAL4}} + \frac{SD_{W^{1118}-GAL4}}{n_{W^{1118}-GAL4}}}$ ), the %-reduction in activity compared to the control line, the associated *P*-value from ANOVA, and the false-discovery rate (FDR) adjusted *P*-value.

| Test day | Fly line        | Human gene      | Mean | SD   | n  | Difference<br>to w <sup>1118</sup> | SE on<br>difference | %-reduction<br>to w <sup>1118</sup> | <i>P</i> -value | FDR      |
|----------|-----------------|-----------------|------|------|----|------------------------------------|---------------------|-------------------------------------|-----------------|----------|
| 15       | <i>CtsB1</i>    | <i>CTSB</i>     | 1.17 | 1.10 | 45 | -1.46                              | 0.19                | 55.59                               | 1.11E-12        | 9.96E-12 |
| 15       | <i>Vha100-1</i> | <i>ATP6V0A1</i> | 1.62 | 1.33 | 20 | -1.01                              | 0.28                | 38.46                               | 1.15E-01        | 1.47E-01 |
| 15       | <i>MICU3</i>    | <i>MICU3</i>    | 1.71 | 1.10 | 65 | -0.92                              | 0.17                | 34.90                               | 1.31E-06        | 5.91E-06 |
| 15       | <i>Ch1</i>      | <i>SLC44A1</i>  | 1.92 | 1.34 | 45 | -0.70                              | 0.21                | 26.77                               | 9.11E-03        | 1.37E-02 |
| 15       | <i>CG33181</i>  | <i>SLC41A1</i>  | 2.03 | 0.98 | 75 | -0.60                              | 0.16                | 22.82                               | 7.91E-04        | 1.78E-03 |
| 15       | <i>CG7156</i>   | <i>RPS6KL1</i>  | 2.04 | 0.96 | 65 | -0.58                              | 0.17                | 22.17                               | 5.65E-03        | 1.02E-02 |
| 15       | <i>Hip1</i>     | <i>HIP1R</i>    | 3.10 | 1.08 | 60 | 0.48                               | 0.18                | -18.11                              | 5.72E-04        | 1.72E-03 |
| 15       | <i>CG32066</i>  | <i>FAM49B</i>   | 2.44 | 1.03 | 75 | -0.18                              | 0.16                | 6.89                                | 5.42E-01        | 5.42E-01 |
| 15       | <i>Mccc1</i>    | <i>MCCC1</i>    | 2.75 | 1.14 | 70 | 0.13                               | 0.17                | -4.87                               | 1.68E-01        | 1.89E-01 |

**Supplementary Table S9** | Average survival from day 5 to day 10, and average survival from day 5 to day 15. The %-survival was computed as proportion of flies that survived from first test day (i.e., day 5) to test day 2 and test day 3 and is reported as the mean of the mean within replicate (i.e., across technical replicates).

| Line  | Gene            | Mean %-survival from |            |
|-------|-----------------|----------------------|------------|
|       |                 | Day 5 - 10           | Day 5 - 15 |
| 41259 | <i>MICU3</i>    | 100                  | 100        |
| 60000 | <i>control</i>  | 100                  | 100        |
| 44825 | <i>CG32066</i>  | 100                  | 100        |
| 6465  | <i>ClC-c</i>    | 25                   | 23         |
| 16137 | <i>Hip1</i>     | 100                  | 100        |
| 22924 | <i>Vha100-1</i> | 62                   | 52         |
| 12242 | <i>Ctl1</i>     | 100                  | 99         |
| 45345 | <i>CtsB1</i>    | 92                   | 72         |
| 47868 | <i>CG33181</i>  | 100                  | 100        |
| 25406 | <i>Mccc1</i>    | 100                  | 99         |
| 26035 | <i>CG7156</i>   | 99                   | 99         |
